# Supplementary material for: Kaptive 2.0: updated capsule and lipopolysaccharide locus typing for the Klebsiella pneumoniae species complex
Source: PubMed Central journal article supplement (PMC9176290; doi:10.1099/mgen.0.000800), 2022-03-21
Supplement: mgen-8-0800-s001.pdf [file mgen-8-0800-s001.pdf]

**Supplementary Table 1. Novel K loci identified in this study**

| K locus | Reference genome/read accession | Length (bp) | #CDS | #genomes |
|---------|---------------------------------|-------------|------|----------|
| KL171   | GCF_001874715.1                 | 24,175      | 21   | 1        |
| KL172   | ERR3449083                      | 27,593      | 23   | 1        |
| KL173*  | GCF_003990375.1                 | 25,719      | 21   | 4        |
| KL174   | ERR315145                       | 24,175      | 20   | 15       |
| KL175   | ERR4367681                      | 28,533      | 25   | 1        |
| KL176*  | ERR3448903                      | 25,166      | 19   | 5        |
| KL177   | T7-221                          | 29,929      | 25   | 8        |
| KL178   | T7-392                          | 28,865      | 24   | 3        |
| KL179   | GCF_900407305.1                 | 29,218      | 23   | 2        |
| KL180   | T7-177                          | 30,215      | 24   | 7        |
| KL181*  | ERR4367597                      | 27,966      | 23   | 9        |
| KL182   | JAJHNT000000000                 | 26,104      | 22   | 2        |
| KL183   | T7-391                          | 22,626      | 19   | 33       |
| KL184*  | ERR4367641                      | 26,378      | 24   | 2        |
| KL185*  | GCF_900493845.1                 | 26,462      | 21   | 3        |
| KL186   | GCF_002247665.1                 | 25,893      | 21   | 5        |

\*K loci where IS were manually removed from the reference sequence
